# Supplementary material
Source: PubMed Central journal article supplement (PMC4206587)
Supplement: NIHMS628363-supplement-001289_-_Supplemental_Material.pdf [file NIHMS628363-supplement-001289_-_Supplemental_Material.pdf]

# SUPPLEMENTAL MATERIAL

## SUPPLEMENTAL FIGURES

Supplemental Figure 1

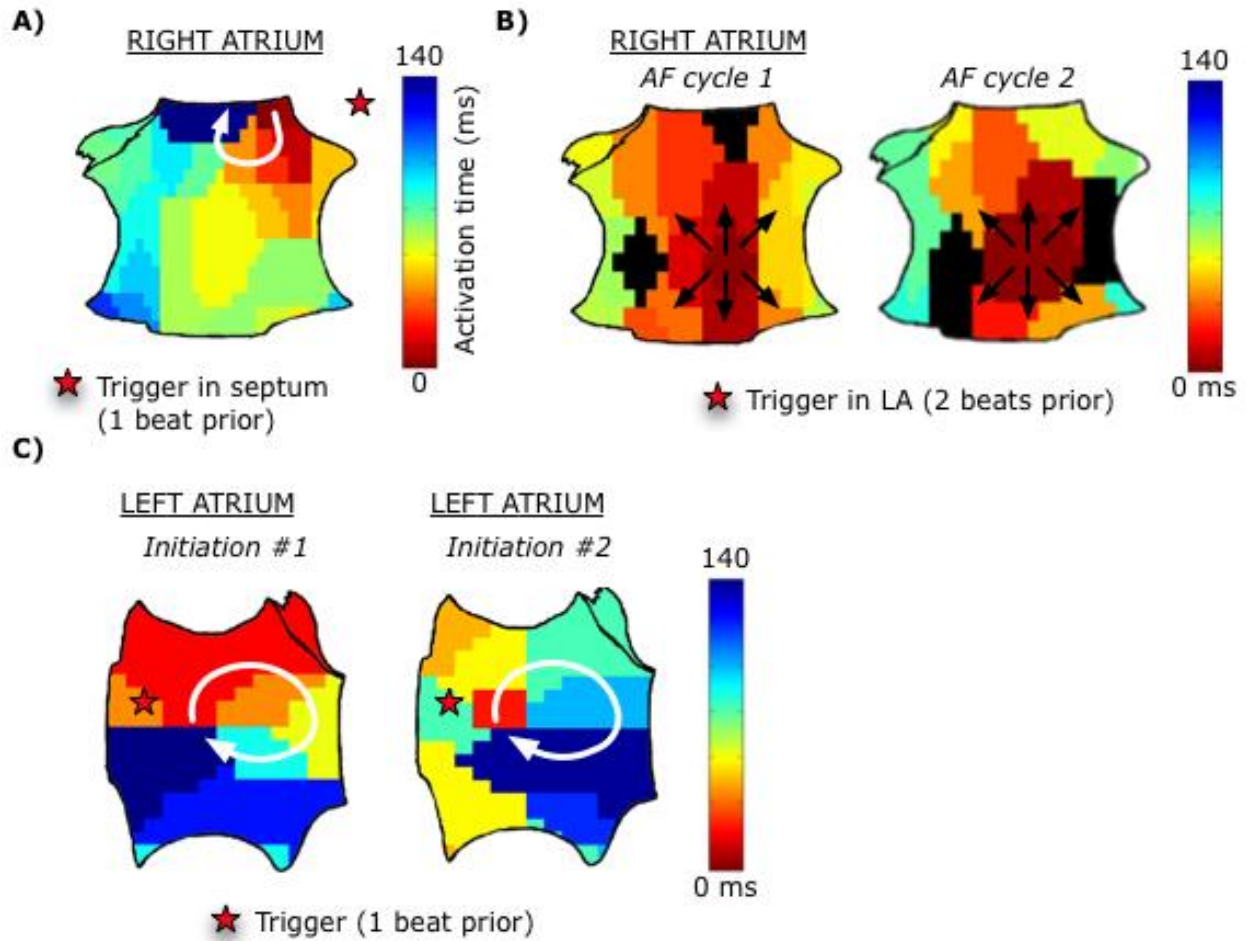

## SUPPLEMENTAL FIGURE LEGENDS

### Supplemental Figure 1:

**Additional AF initiations.** (a) Spontaneous AF initiation by a clockwise spiral wave in the high septal  
10 right atrium in a 67-year-old man with persistent AF. (b) Spontaneous initiation of paroxysmal AF via a  
repetitive focal driver in a 57-year-old man, in which the focal driver in the low posterior RA for the first  
2 AF cycles continued into sustained AF. (c) Two pacing-induced initiations in a 61-year-old man with  
paroxysmal AF. Each initiation demonstrates the same clockwise spiral wave in the mid posterior left  
atrium that initiates AF. In this patient rapid burst pacing was performed in the right superior pulmonary  
15 vein at cycle length 280 ms (214 bpm; initiation #1) and cycle length 500 ms (120 bpm; initiation #2).
